# Supplementary material for: The efficacy of automated feedback after internet-based depression screening: Study protocol of the German, three-armed, randomised controlled trial DISCOVER
Source: PubMed Central journal article supplement — Internet Interv. 2021 Jul 21;25:100435. doi: 10.1016/j.invent.2021.100435 (PMC8350593; doi:10.1016/j.invent.2021.100435), 2021-07-21
Supplement: mmc2.pdf [file mmc2.pdf]

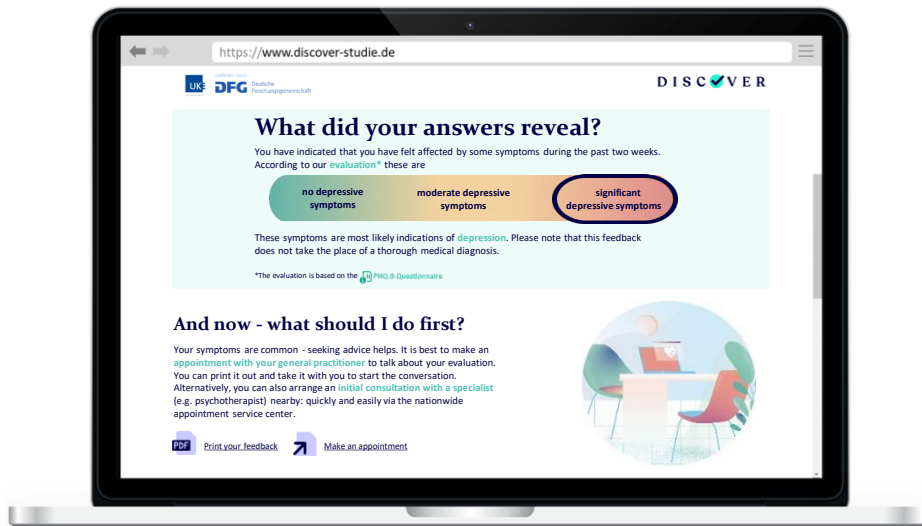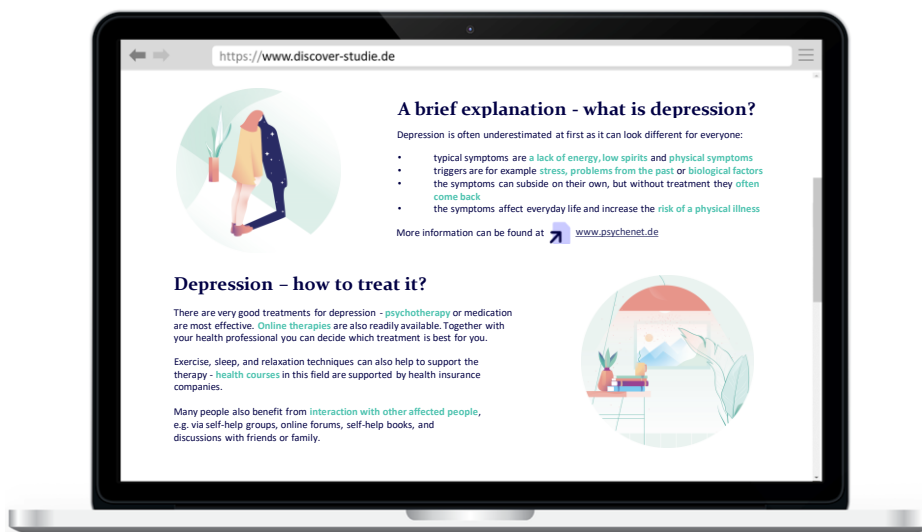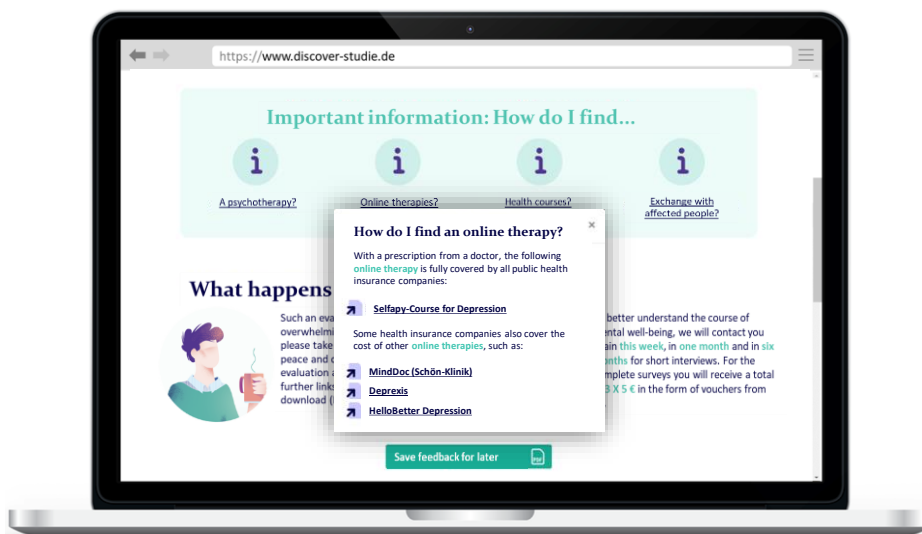

Supplemental Fig. II. STANDARD FEEDBACK: All screens as displayed on the DISCOVER study website, including the layer 'How do I find an online therapy?' (English translation).
