# Supplementary material for: The efficacy of automated feedback after internet-based depression screening: Study protocol of the German, three-armed, randomised controlled trial DISCOVER
Source: PubMed Central journal article supplement — Internet Interv. 2021 Jul 21;25:100435. doi: 10.1016/j.invent.2021.100435 (PMC8350593; doi:10.1016/j.invent.2021.100435), 2021-07-21
Supplement: mmc3.pdf [file mmc3.pdf]

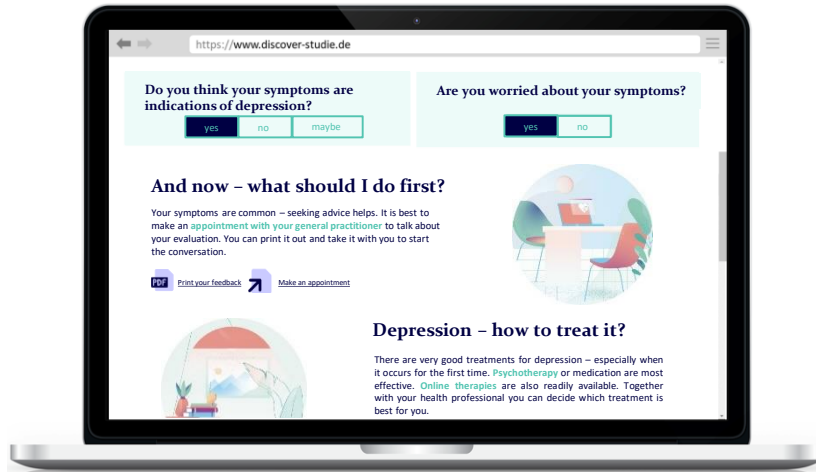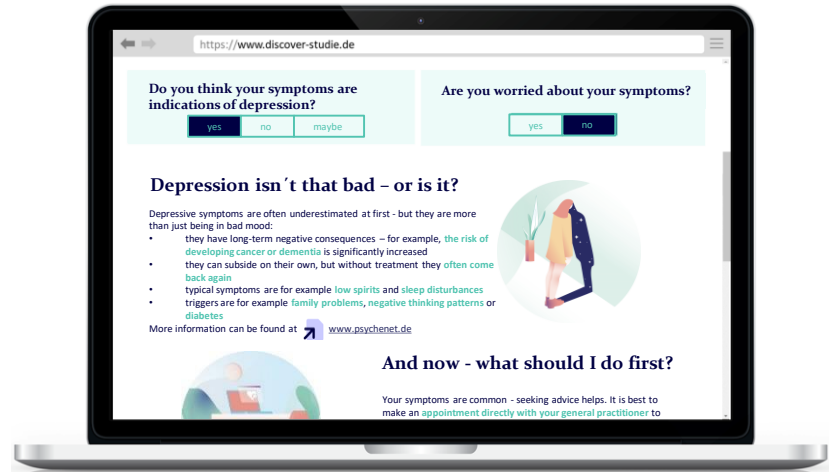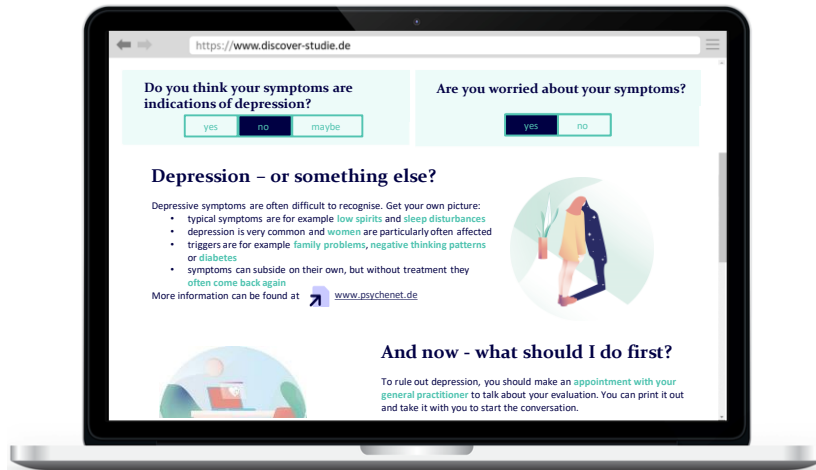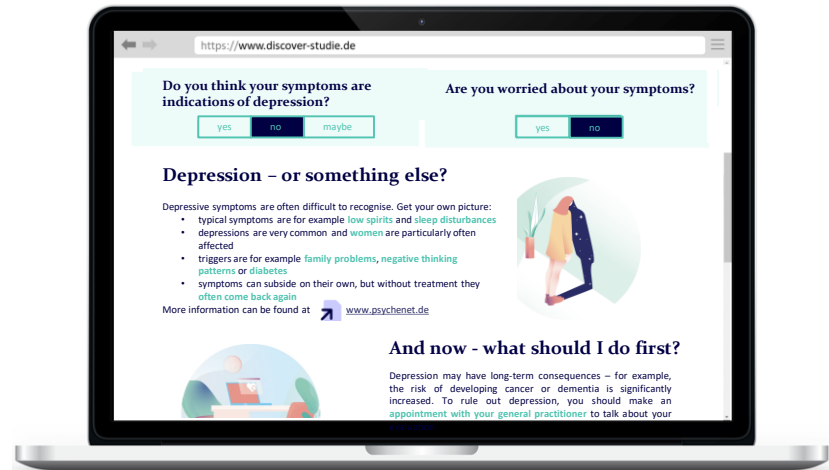

Supplemental Fig. III. TAILORED FEEDBACK: Examples for all four combinations of answers to the questions ‘Do you think your symptoms are indications of depression?’ and ‘Do you worry about your symptoms?’ as displayed on the DISCOVER study website (English translation).
